# Supplementary material for: Modeling of COVID-19 Pandemic vis-à-vis Some Socio-Economic Factors
Source: Frontiers journal article supplement (doi:10.3389/fams.2021.786983), 2022-01-05
Supplement: Data_Sheet_1.docx [file Data_Sheet_1.docx]

Table 2. Developed and Developing Countries Data

| Country Name | 10%  Lowest Income | 10% Highest  Income | S.I Index | D.I | CCI | Gini Index | Country Name | Immigration Rate |
| --- | --- | --- | --- | --- | --- | --- | --- | --- |
| ALBANIA | 3.1 | 24.8 | 8.00 | 0.66 | - | 33.2 | AUSTRIA | 7.4 |
| AUSTRIA | 3.0 | 23.0 | 7.67 | 1.35 | 99.15 | 29.7 | BELARUS | 1.9 |
| BELGIUM | 3.3 | 21.9 | 8.11 | 1.27 | 100.75 | 27.4 | BELGIUM | 4.2 |
| BHUTAN | 2.7 | 27.9 | 10.33 | 0.30 | - | 37.4 | BRAZIL | 0.1 |
| BULGARIA | 1.9 | 31.9 | 16.79 | 0.44 | - | 40.4 | BULGARIA | -0.3 |
| CANADA | 2.7 | 25.3 | 9.37 | 1.15 | - | 33.3 | CANADA | 6.6 |
| CHILE | 2.3 | 36.3 | 15.78 | 0.58 | 96.55 | 44.4 | CHINA | -0.2 |
| CROTIA | 2.7 | 22.8 | 8.44 | 0.81 | - | 30.4 | CYPRUS | 4.2 |
| CYPRUS | 3.4 | 25.5 | 7.50 | 0.90 | - | 31.4 | CZECH | 2.1 |
| CZECH | 4.2 | 21.5 | 5.12 | 1.49 | 98.97 | 24.9 | DENMARK | 2.6 |
| DENMARK | 3.7 | 24.0 | 6.49 | 1.55 | 100.50 | 28.7 | ESTONIA | 0.3 |
| DJIBOUTI | 1.9 | 32.3 | 17.00 | 0.14 | - | 41.6 | FINLAND | 2.5 |
| EGYPT | 3.8 | 26.9 | 7.08 | 0.70 | - | 31.5 | FRANCE | 0.6 |
| ESTONIA | 3.0 | 22.5 | 7.50 | 0.89 | 97.59 | 30.4 | GERMANY | 6.6 |
| FINLAND | 3.8 | 22.6 | 5.95 | 1.52 | 100.27 | 27.4 | GREECE | -1.5 |
| FRANCE | 3.2 | 25.8 | 8.06 | 1.40 | 98.12 | 31.6 | HUNGARY | 1.3 |
| GABON | 2.2 | 27.7 | 12.59 | 0.22 | - | 38.0 | IRELAND | 4.9 |
| GREECE | 2.4 | 25.9 | 10.79 | 0.72 | 98.11 | 34.4 | ISRAEL | 1.2 |
| HUNGARY | 3.0 | 23.9 | 7.97 | 0.84 | 98.88 | 30.6 | ITALY | 2.5 |
| IRAN | 2.3 | 31.3 | 13.61 | 0.64 | - | 40.8 | KOSOVO | - |
| ITALY | 1.9 | 26.7 | 14.05 | 0.62 | 100.25 | 35.9 | LATVIA | -7.6 |
| KAZAKHSTAN | 4.3 | 23.0 | 5.35 | 0.55 | - | 27.5 | LITHUANIA | -11.6 |
| KOSOVO | 3.8 | 24.6 | 6.47 | - | - | 29.0 | LUXEMBOURG | 16.3 |
| LATVIA | 2.3 | 26.9 | 11.70 | 0.53 | 95.05 | 35.6 | MALTA | 2.1 |
| LESOTHO | 1.7 | 32.9 | 19.35 | 0.48 |  | 44.9 | MEXICO | -0.5 |
| LITHUANIA | 2.1 | 28.4 | 13.52 | 0.49 | 100.98 | 37.3 | NETHERLANDS | 0.9 |
| LUXEMBOURG | 2.4 | 25.8 | 10.75 | 0.49 | 98.52 | 34.9 | MARCEDONIA | -0.5 |
| MALTA | 3.4 | 23.3 | 6.85 | 1.31 | - | 29.2 | NORWAY | 5.3 |
| MAURITIUS | 2.9 | 29.9 | 10.31 | 0.57 | - | 36.8 | POLAND | -0.8 |
| MYANMAR | 3.8 | 25.5 | 6.71 | 0.71 | - | 30.7 | PORTUGAL | -0.6 |
| NETHERLAND | 3.5 | 23.3 | 6.66 | 1.50 | 99.93 | 28.5 | ROMANIA | -3.8 |
| MARCEDONIA | 1.7 | 23.8 | 14.00 | 0.47 | - | 34.2 | RUSSIA | 1.7 |
| NORWAY | 3.3 | 21.6 | 6.55 | 1.53 | - | 27.0 | SERBIA | 0.5 |
| POLAND | 3.2 | 23.5 | 7.34 | 0.86 | 98.70 | 29.7 | SLOVAK | 0.3 |
| PORTUGAL | 2.7 | 26.7 | 9.89 | 0.95 | 97.41 | 33.8 | SLOVENIA | 1.0 |
| ROMANIA | 1.6 | 24.9 | 15.56 | 0.36 | - | 36.0 | SPAIN | 0.9 |
| SERBIA | 1.4 | 25.6 | 18.29 | 0.47 | - | 36.2 | SWEDEN | 4.0 |
| SAO TOME | 1.3 | 49.1 | 37.77 | 0.17 | - | 56.3 | SWITZERLAND | 6.1 |
| SLOVENIA | 4.1 | 20.4 | 4.98 | 1.67 | 96.34 | 24.2 | TURKEY | 3.5 |
| SPAIN | 2.1 | 25.4 | 12.09 | 0.74 | 96.61 | 34.7 | UKRAINE | 0.2 |
| SWEDEN | 3.0 | 22.3 | 7.43 | 1.47 | 101.89 | 28.8 | UK | 3.9 |
| SWITZERLAND | 3.1 | 25.5 | 8.23 | 1.44 | 97.47 | 32.7 | USA | 2.9 |
| TANZANIA | 2.9 | 33.1 | 11.41 | 0.32 | - | 40.5 | - | - |
| ZIMBABWE | 2.5 | 34.8 | 13.92 | 0.34 | - | 44.3 | - | - |

**Table 3.** OECD Countries Data

| S/N | Country Name | 10% Lowest Income | 10% Highest Income | S.F Index | D.I | CCI | Gini Index |
| --- | --- | --- | --- | --- | --- | --- | --- |
| 1 | Australia | 2.8 | 26.1 | 9.32 | 1.00 | 100.86 | 32.5 |
| 2 | Austria | 3.3 | 22.5 | 6.82 | 4.52 | 99.15 | 28.0 |
| 3 | Belgium | 3.6 | 20.6 | 5.72 | 1.80 | 100.75 | 25.8 |
| 4 | Bulgaria | 1.9 | 31.9 | 16.79 | 0.44 | - | 40.8 |
| 5 | Canada | 2.6 | 24.2 | 9.31 | 1.16 | - | 30.3 |
| 6 | Chile | 1.8 | 37.1 | 20.61 | 0.44 | 96.55 | 46.0 |
| 7 | Costa Rica | 1.5 | 36.3 | 24.20 | 0.31 | 98.94 | 47.8 |
| 8 | Czech | 4.0 | 22.2 | 5.55 | 1.38 | 98.97 | 24.9 |
| 9 | Denmark | 4.0 | 21.2 | 5.30 | 1.90 | 100.50 | 26.4 |
| 10 | Estonia | 2.3 | 26.3 | 11.43 | 0.59 | 97.59 | 30.5 |
| 11 | Finland | 4.0 | 21.2 | 5.30 | 1.71 | 100.27 | 26.9 |
| 12 | France | 3.5 | 24.2 | 6.91 | 1.63 | 98.12 | 30.1 |
| 13 | Germany | 3.5 | 23.5 | 6.71 | 1.70 | 98.97 | 28.9 |
| 14 | Greece | 2.2 | 25.4 | 11.55 | 0.67 | 98.11 | 30.6 |
| 15 | Hungary | 3.1 | 22.5 | 7.26 | 0.92 | 98.88 | 28.9 |
| 16 | Iceland | 4.1 | 20.6 | 5.02 | 1.69 | - | 25.0 |
| 17 | Ireland | 3.1 | 24.4 | 7.87 | 0.88 | 100.48 | 29.5 |
| 18 | Israel | 2.0 | 26.3 | 13.15 | 0.57 | 99.15 | 34.8 |
| 19 | Italy | 2.1 | 24.4 | 11.62 | 0.75 | 100.25 | 33.4 |
| 20 | Korea | 2.2 | 22.0 | 10.00 | 0.76 | 99.43 | 34.5 |
| 21 | Latvia | 2.4 | 26.1 | 10.88 | 0.57 | 95.05 | 35.1 |
| 22 | Lithuania | 2.1 | 28.4 | 13.52 | 0.49 | 100.98 | 36.1 |
| 23 | Luxembourg | 3.5 | 22.1 | 6.31 | 0.84 | 98.52 | 31.8 |
| 24 | Mexico | 1.7 | 36.4 | 21.41 | 0.25 | 99.42 | 45.8 |
| 25 | Netherlands | 3.3 | 22.7 | 6.88 | 1.45 | 99.93 | 28.5 |
| 26 | Norway | 3.4 | 20.6 | 6.06 | 1.66 | - | 26.2 |
| 27 | Poland | 3.1 | 23.4 | 7.55 | 0.84 | 98.70 | 28.1 |
| 28 | Portugal | 2.4 | 26.2 | 10.92 | 0.86 | 97.41 | 31.7 |
| 29 | Romania | 1.6 | 24.9 | 15.56 | 0.36 | - | 35.0 |
| 30 | Russia | 2.9 | 29.1 | 10.03 | 0.53 | 96.12 | 33.1 |
| 31 | Slovak | 3.3 | 21.6 | 6.55 | 1.02 | 97.71 | 23.6 |
| 32 | Slovenia | 3.6 | 20.4 | 5.67 | 1.46 | 96.34 | 24.9 |
| 33 | Spain | 2.0 | 24.7 | 12.35 | 0.73 | 96.61 | 33.0 |
| 34 | Sweden | 3.5 | 22.6 | 6.46 | 1.69 | 101.89 | 27.5 |
| 35 | Switzerland | 3.4 | 24.1 | 7.09 | 1.68 | 97.47 | 29.9 |
| 36 | UK | 2.7 | 28.6 | 10.59 | 0.94 | 98.71 | 36.6 |
| 37 | USA | 1.6 | 29.2 | 18.25 | 0.93 | 98.68 | 39.0 |

**Table 4.** AFRICA Countries Data

| S/N | Country Name | SDG Index | EPI | Temperature | HDI | S.I | L.E | TB Incidence |
| --- | --- | --- | --- | --- | --- | --- | --- | --- |
| 1 | Algeria | 65.8 | 57.18 | 18.79 | 21 | 72.22 | 78.0 | - |
| 2 | Angola | 49.3 | 37.44 | 21.55 | - | 58.33 | 61.0 | 3.51 |
| 3 | Benin | 51.5 | 38.17 | 27.55 | 3.2 | 43.52 | 61.0 | 0.55 |
| 4 | Botswana | 61.6 | 51.70 | 21.50 | 20 | 62.04 | 65.0 | - |
| 5 | Bukina Faso | 53.5 | 42.83 | 28.29 | 0.6 | 22.22 | 63.0 | 0.47 |
| 6 | Burundi | 50.3 | 27.43 | 20.80 | - | 20.37 | 67.0 | 1.07 |
| 7 | Cabo Verde | 64.1 | 56.94 | 23.30 | 19 | 45.37 | 73.0 | 0.46 |
| 8 | Cameroon | 51.6 | 40.81 | 24.60 | 1.4 | 35.19 | 62.0 | 1.79 |
| 9 | CAR | 36.7 | 36.42 | 24.90 | 2.9 | 18.52 | 54.0 | 5.40 |
| 10 | Chad | 38.7 | 45.34 | 26.55 | - | 22.22 | 58.0 | 1.42 |
| 11 | Comoros | 47.6 | 44.24 | 25.55 | 4.2 | - | 66.0 | 0.35 |
| 12 | DRC | 41.6 | 30.41 | 24.00 | 0.1 | - | 61.0 | 3.20 |
| 13 | Congo | 48.7 | 42.39 | 24.55 | - | 47.22 | 61.0 | 3.73 |
| 14 | Ivory Coast | 55.6 | 45.25 | 26.35 | 21 | 25.93 | 61.0 | 1.37 |
| 15 | Djibouti | 49.7 | 40.04 | 28.00 | 40 | 37.96 | 65.0 | - |
| 16 | Egypt | 63.8 | 61.21 | 22.10 | 3.6 | 54.63 | 74.0 | - |
| 17 | Equatorial | 43.4 | 60.40 | 24.55 | - | - | 66.0 | 1.81 |
| 18 | Eritea | 43.3 | 39.34 | 25.50 | 0.1 | 86.11 | 66.0 | 0.86 |
| 19 | Eswatini | 52.4 | - | 21.40 | 5.0 | 68.52 | 59.0 | 3.63 |
| 20 | Ethiopia | 53.2 | 44.78 | 22.20 | 8.4 | 50.93 | 68.0 | 1.40 |
| 21 | Gabon | 59.4 | 45.05 | 25.05 | 20 | 50.93 | 69.0 | 5.21 |
| 22 | Gambia | 51.9 | 42.42 | 27.50 | 4.3 | 44.44 | 66.0 | 1.58 |
| 23 | Ghana | 61.2 | 49.66 | 27.20 | 2.5 | 50.93 | 68.0 | 1.44 |
| 24 | Guinea | 49.4 | 46.62 | 25.70 | 3.1 | 52.78 | 63.0 | 1.76 |
| 25 | Bissau | 45.5 | 44.67 | 26.75 | 1.3 | - | 63.0 | 3.61 |
| 26 | Kenya | 56.6 | 47.25 | 24.75 | 0.9 | 50.93 | 69.0 | 2.67 |
| 27 | Lesotho | 50.9 | 33.78 | 11.85 | 6.8 | 65.74 | 53.0 | 6.54 |
| 28 | Liberia | 48.0 | 41.62 | 25.30 | - | 40.74 | 65.0 | 3.08 |
| 29 | Libya | - | 49.79 | 21.80 | 34 | 76.85 | 77.0 | - |
| 30 | Madagasca | 45.6 | 33.73 | 22.65 | 4.9 | 37.04 | 67.0 | 2.33 |
| 31 | Malawi | 52.3 | 49.21 | 21.90 | 1.9 | 48.15 | 63.0 | 1.46 |
| 32 | Mali | 51.7 | 43.71 | 28.25 | 2.5 | 48.15 | 62.0 | 0.52 |
| 33 | Mauritania | 51.3 | 39.24 | 27.65 | 14 | 29.63 | 65.0 | 0.89 |
| 34 | Mauritius | 66.2 | 56.63 | 22.40 | 3.0 | 93.52 | 76.0 | 0.12 |
| 35 | Morocco | 64.4 | 63.47 | 18.10 | 19 | 76.85 | 73.0 | - |
| 36 | Mozambiqu | 51.4 | 46.37 | 23.80 | 5.1 | 55.56 | 56.0 | 3.61 |
| 37 | Namibia | 57.1 | 58.46 | 20.95 | 1.4 | 42.59 | 65.0 | 4.86 |
| 38 | Niger | 50.3 | 35.74 | 27.15 | 7.3 | 34.26 | 59.0 | 0.84 |
| 39 | Nigeria | 47.1 | 54.76 | 26.80 | 0.1 | 45.37 | 60.0 | 2.19 |
| 40 | Rwanda | 57.9 | 43.68 | 18.85 | 1.8 | 71.30 | 65.0 | 0.57 |
| 41 | Sao Tome | 61.8 | 54.01 | 23.75 | - | - | 66.0 | 1.14 |
| 42 | Senegal | 57.0 | 49.52 | 27.85 | 12 | 13.89 | 63.0 | 1.17 |
| 43 | Seychelles | - | 66.02 | 27.15 | - | 65.74 | 76.0 | 0.16 |
| 44 | Sierra Leone | 49.7 | 42.54 | 23.82 | 6.6 | 48.15 | 60.0 | 2.95 |
| 45 | Somalia | 40.1 | - | 27.05 | - | 47.22 | 54.0 | 2.58 |
| 46 | SouthAfrica | 60.4 | 44.73 | 18.75 | 1.0 | 48.15 | 65.0 | 6.15 |
| 47 | SouthSudan | 29.2 | - | - | - | 72.22 | - | 2.27 |
| 48 | Sudan | 47.4 | 51.49 | 26.90 | 5.4 | 24.07 | 67.0 | 0.67 |
| 49 | Tanzania | 55.9 | 50.83 | 22.35 | 16 | 8.33 | 64.0 | 2.37 |
| 50 | Togo | 52.7 | 41.78 | 27.15 | 1.1 | 67.59 | 67.0 | 0.37 |
| 51 | Tunisia | 66.1 | 62.35 | 16.30 | 5.4 | 62.04 | 76.0 | - |
| 52 | Uganda | 54.9 | 44.28 | 22.80 | 0.5 | 53.70 | 68.0 | 2.00 |
| 53 | Zambia | 53.0 | 50.97 | 21.40 | 20 | 36.11 | 54.0 | 3.33 |
| 54 | Zimbabwe | 54.8 | 43.41 | 21.00 | 16 | 53.70 | 62.0 | 1.99 |

| S/N | Country Name | Gini Index | 10% Lowest Income | 10% Highest Income | S.F Index | D.I | Theil Index |
| --- | --- | --- | --- | --- | --- | --- | --- |
| 1 | Argentina | 41.4 | 1.8 | 29.9 | 16.61 | 0.58 | 0.312583 |
| 2 | Bolivia | 42.2 | 1.5 | 30.4 | 20.27 | 0.31 | 0.474293 |
| 3 | Brazil | 53.9 | 1.0 | 42.5 | 42.50 | 0.22 | 0.528996 |
| 4 | Chile | 46.0 | 1.8 | 37.1 | 20.61 | 0.44 | 0.529734 |
| 5 | Colombia | 50.4 | 1.4 | 39.7 | 28.36 | 0.27 | 0.569899 |
| 6 | Costa Rica | 48.0 | 1.5 | 36.3 | 24.20 | 0.31 | 0.429539 |
| 7 | Dominican | 43.7 | 2.3 | 35.2 | 15.30 | 0.37 | 0.429447 |
| 8 | Ecuador | 45.4 | 1.6 | 34.4 | 21.50 | 0.38 | 0.404237 |
| 9 | El Salvador | 38.6 | 2.4 | 29.4 | 12.25 | 0.58 | 0.327834 |
| 10 | Guatemala | 48.3 | 1.7 | 38.0 | 22.35 | 0.26 | 0.509287 |
| 11 | Honduras | 52.1 | 0.9 | 39.1 | 43.44 | 0.16 | 0.476235 |
| 12 | Mexico | 45.4 | 2.0 | 36.4 | 18.20 | 0.30 | 0.511219 |
| 13 | Nicaragua | 46.2 | 2.0 | 37.2 | 18.6 | 0.46 | 0.479821 |
| 14 | Panama | 49.2 | 1.2 | 37.1 | 30.92 | 0.24 | 0.491384 |
| 15 | Paraguay | 46.2 | 1.7 | 35.9 | 21.12 | 0.31 | 0.618109 |
| 16 | Peru | 42.8 | 1.8 | 32.1 | 17.83 | 0.29 | 0.355739 |
| 17 | Uruguay | 39.7 | 2.3 | 29.7 | 12.91 | 0.71 | 0.307564 |

**Table 5.** Latino-American Countries Data

**Table 6.** Result for Figures 6a to 6d

| Figures | Slope | Intercept | rvalue | pvalue | Stderr | R-squared for Linear | RMSE for linear | R-squared for polynomial of order six | RMSE for polynomial of order six |
| --- | --- | --- | --- | --- | --- | --- | --- | --- | --- |
| 6a | 0.1146366 | -0.00371 | 0.4387 | 0.003 | 0.03667 | 0.192472 | 0.104 | - | - |
| 6b | -0.0025 | 0.078887556 | -0.327 | 0.0367 | 0.001 | 0.107118 | 0.030655 | - | - |
| 6c | 0.00173 | 0.066951 | 0.26367566 | 0.0875 | 0.0009889 | 0.069525 | 0.035486 | 0.30 | 0.04060 |
| 6d | 0.0015999 | 0.081 | 0.2861 | 0.132 | 0.00103 | 0.081868 | 0.054922 | 0.35 | 0.0728659 |
